# Supplementary material for: Within-Host Evolution of Burkholderia pseudomallei over a Twelve-Year Chronic Carriage Infection
Source: PubMed Central journal article supplement — mBio. 2013 Jul 16;4(4):e00388-13. doi: 10.1128/mBio.00388-13 (PMC3735121; doi:10.1128/mbio.00388-13), 2013-07-16
Supplement: mbo004131565sf01.pdf [file mbo004131565sf01.pdf]

\*\*\* \*\*\*\*\*  
MSHR1043 MVNNTKIAIIGASCRFPGGVAGLEEYWQLLKSERDAVTEIPPERFGTDFYRHPSKREPGKSYTFSAGVLDNVAGFDAAFFG 80  
MSHR1655 MVNNTKIAIIGASCRFPGGVAGLEEYWQLLKSERDAVTEIPPERFGTDFYRHPSKREPGKSYTFSAGVLDNVAGFDAAFFG 80  
MSHR6686 MVNNTKIAIIGASCRFPGGVAGLEEYWQLLKSERDAVTEIPPERFGTDFYRHPSKREPGKSYTFSAGVLDNVAGFDAAFFG 80  
K96243 MVNNTKIAIIGASCRFPGGVAGLEEYWQLLKSERDAVTEIPPERFGTDFYRHPSKREPGKSYTFSAGVLDNVAGFDAAFFG 80  
1710b MVNNTKIAIIGASCRFPGGVAGLEEYWQLLKSERDAVTEIPPERFGTDFYRHPSKREPGKSYTFSAGVLDNVAGFDAAFFG 80  
1106a MVNNTKIAIIGASCRFPGGVAGLEEYWQLLKSERDAVTEIPPERFGTDFYRHPSKREPGKSYTFSAGVLDNVAGFDAAFFG 80  
668 MVNNTKIAIIGASCRFPGGVAGLEEYWQLLKSERDAVTEIPPERFGTDFYRHPSKREPGKSYTFSAGVLDNVAGFDAAFFG 80  
1026b MVNNTKIAIIGASCRFPGGVAGLEEYWQLLKSERDAVTEIPPERFGTDFYRHPSKREPGKSYTFSAGVLDNVAGFDAAFFG 80  
BPC006 MVNNTKIAIIGASCRFPGGVAGLEEYWQLLKSERDAVTEIPPERFGTDFYRHPSKREPGKSYTFSAGVLDNVAGFDAAFFG 80  
1.....10.....20.....30.....40.....50.....60.....70.....80

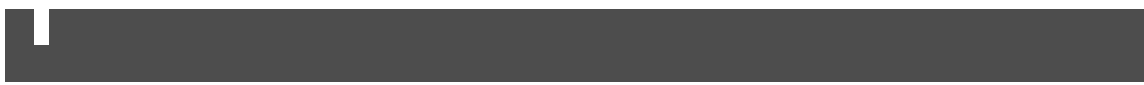

\*\*\*\*\*  
MSHR1043 ISPREATQMDPQQRLLLELAWAEAFEDAGVRPADMRGNSCGVYVGVAGTDYGNRSMDLNAIDPYSATGNLTSIASNRVSY 160  
MSHR1655 ISPREATQMDPQQRLLLELAWAEAFEDAGVRPADMRGNSCGVYVGVAGTDYGNRSMDLNAIDPYSATGNLTSIASNRVSY 160  
MSHR6686 ISPREATQMDPQQRLLLELAWAEAFEDAGVRPADMRGNSCGVYVGVAGTDYGNRSMDLNAIDPYSATGNLTSIASNRVSY 160  
K96243 ISPREATQMDPQQRLLLELAWAEAFEDAGVRPADMRGNSCGVYVGVAGTDYGNRSMDLNAIDPYSATGNLTSIASNRVSY 160  
1710b ISPREATQMDPQQRLLLELAWAEAFEDAGVRPADMRGNSCGVYVGVAGTDYGNRSMDLNAIDPYSATGNLTSIASNRVSY 160  
1106a ISPREATQMDPQQRLLLELAWAEAFEDAGVRPADMRGNSCGVYVGVAGTDYGNRSMDLNAIDPYSATGNLTSIASNRVSY 160  
668 ISPREATQMDPQQRLLLELAWAEAFEDAGVRPADMRGNSCGVYVGVAGTDYGNRSMDLNAIDPYSATGNLTSIASNRVSY 160  
1026b ISPREATQMDPQQRLLLELAWAEAFEDAGVRPADMRGNSCGVYVGVAGTDYGNRSMDLNAIDPYSATGNLTSIASNRVSY 160  
BPC006 ISPREATQMDPQQRLLLELAWAEAFEDAGVRPADMRGNSCGVYVGVAGTDYGNRSMDLNAIDPYSATGNLTSIASNRVSY 160  
.....90.....100.....110.....120.....130.....140.....150.....160

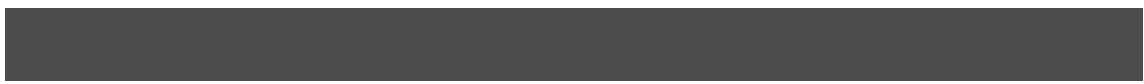

\*\*\*\*\*  
MSHR1043 LFDLRGPPMSVDTACSSSLVALHQAVQALQSGEAETALAGGVNLLLHPFGFVFSKASMLSPRGRCAFADATGDGYVRAE 240  
MSHR1655 LFDLRGPPMSVDTACSSSLVALHQAVQALQSGEAETALAGGVNLLLHPFGFVFSKASMLSPRGRCAFADATGDGYVRAE 240  
MSHR6686 LFDLRGPPMSVDTACSSSLVALHQAVQALQSGEAETALAGGVNLLLHPFGFVFSKASMLSPRGRCAFADATGDGYVRAE 240  
K96243 LFDLRGPPMSVDTACSSSLVALHQAVQALQSGEAETALAGGVNLLLHPFGFVFSKASMLSPRGRCAFADATGDGYVRAE 240  
1710b LFDLRGPPMSVDTACSSSLVALHQAVQALQSGEAETALAGGVNLLLHPFGFVFSKASMLSPRGRCAFADATGDGYVRAE 240  
1106a LFDLRGPPMSVDTACSSSLVALHQAVQALQSGEAETALAGGVNLLLHPFGFVFSKASMLSPRGRCAFADATGDGYVRAE 240  
668 LFDLRGPPMSVDTACSSSLVALHQAVQALQSGEAETALAGGVNLLLHPFGFVFSKASMLSPRGRCAFADATGDGYVRAE 240  
1026b LFDLRGPPMSVDTACSSSLVALHQAVQALQSGEAETALAGGVNLLLHPFGFVFSKASMLSPRGRCAFADATGDGYVRAE 240  
BPC006 LFDLRGPPMSVDTACSSSLVALHQAVQALQSGEAETALAGGVNLLLHPFGFVFSKASMLSPRGRCAFADATGDGYVRAE 240  
.....170.....180.....190.....200.....210.....220.....230.....240

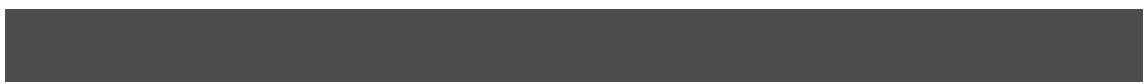

\*\*\*\*\*  
MSHR1043 GGAFVLLKPLDRAIADGDTIHAVIAGSGVNSVGHSPGGISVPGAAAQAALLRSVYARAGVDPQSLAYLEAHGTGTAVGDP 320  
MSHR1655 GGAFVLLKPLDRAIADGDTIHAVIAGSGVNSVGHSPGGISVPGAAAQAALLRSVYARAGVDPQSLAYLEAHGTGTAVGDP 320  
MSHR6686 GGAFVLLKPLDRAIADGDTIHAVIAGSGVNSVGHSPGGISVPGAAAQAALLRSVYARAGVDPQSLAYLEAHGTGTAVGDP 320  
K96243 GGAFVLLKPLDRAIADGDTIHAVIAGSGVNSVGHSPGGISVPGAAAQAALLRSVYARAGVDPQSLAYLEAHGTGTAVGDP 320  
1710b GGAFVLLKPLDRAIADGDTIHAVIAGSGVNSVGHSPGGISVPGAAAQAALLRSVYARAGVDPQSLAYLEAHGTGTAVGDP 320  
1106a GGAFVLLKPLDRAIADGDTIHAVIAGSGVNSVGHSPGGISVPGAAAQAALLRSVYARAGVDPQSLAYLEAHGTGTAVGDP 320  
668 GGAFVLLKPLDRAIADGDTIHAVIAGSGVNSVGHSPGGISVPGAAAQAALLRSVYARAGVDPQSLAYLEAHGTGTAVGDP 320  
1026b GGAFVLLKPLDRAIADGDTIHAVIAGSGVNSVGHSPGGISVPGAAAQAALLRSVYARAGVDPQSLAYLEAHGTGTAVGDP 320  
BPC006 GGAFVLLKPLDRAIADGDTIHAVIAGSGVNSVGHSPGGISVPGAAAQAALLRSVYARAGVDPQSLAYLEAHGTGTAVGDP 320  
.....250.....260.....270.....280.....290.....300.....310.....320



\*\*\*\*\*;\*\*\*\*\*  
MSHR1043 IEARALIDVVS GARPADRPLLIGSVKTNIGHLETASGMAGLLKAVLCLKHRAVPRSLYFSIPNPAIDFDGGRLRVVDRYM 400  
MSHR1655 IEARALIDVVS GARPADRPLLIGSVKTNIGHLETASGMAGLLKAVLCLKHRAVPRSLYFSIPNPAIDFDGGRLRVVDRYM 400  
MSHR6686 IEARALIDVVS GARPADRPLLIGSVKTNIGHLETASGMAGLLKAVLCLKHRAVPRSLYFSIPNPAIDFDGGRLRVVDRYM 400  
K96243 IEARALIDVVS GARPADRPLLIGSVKTNIGHLETASGMAGLLKAVLCLKHRAVPRSLYFSIPNPAIDFDGGRLRVVDRYM 400  
1710b IEARALIDVVS GARPADRPLLIGSVKTNIGHLETASGMAGLLKAVLCLKHRAVPRSLYFSIPNPAIDFDGGRLRVVDRYM 400  
1106a IEARALIDVVS GARPADRPLLIGSVKTNIGHLETASGMAGLLKAVLCLKHRAVPRSLYFSIPNPAIDFDGGRLRVVDRYM 400  
668 IEARALIDVVS GARPADRPLLIGSVKTNIGHLETASGMAGLLKAVLCLKHRAVPRSLYFSIPNPAIDFDGGRLRVVDRYM 400  
1026b IEARALIDVVS GARPADRPLLIGSVKTNIGHLETASGMAGLLKAVLCLKHRAVPRSLYFSIPNPAIDFDGGRLRVVDRYM 400  
BPC006 IEARALIDVVS GARPADRPLLIGSVKTNIGHLETASGMAGLLKAVLCLKHRAVPRSLYFSIPNPAIDFDGGRLRVVDRYM 400  
.....330.....340.....350.....360.....370.....380.....390.....400

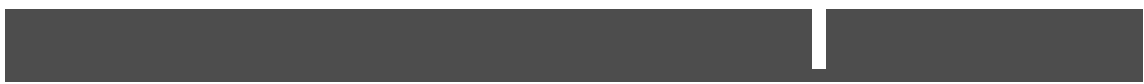

. \*\*\*\*\*  
MSHR1043 PLEAGNAPLTVGVNSFGFGGTNAHIVLTEAPVSAAVADDVPTSATQAARAPSAVLVTARSPNALGALANRYLAALENGDD 480  
MSHR1655 PLEAGNAPLTVGVNSFGFGGTNAHIVLTEAPVSAAVADDVPTSATQAARAPSAVLVTARSPNALGALANRYLAALENGDD 480  
MSHR6686 PLEAGNAPLTVGVNSFGFGGTNAHIVLTEAPVSAAVADDVPTSATQAARAPSAVLVTARSPNALGALANRYLAALENGDD 480  
K96243 PLEAGNAPLTVGVNSFGFGGTNAHIVLTEAPVSAVAVADDVPTSATQAARAPSAVLVTARSPNALGALANRYLAALENGDD 480  
1710b PLEAGNAPLTVGVNSFGFGGTNAHIVLTEAPVSAVAVADDVPTSATQAARAPSAVLVTARSPNALGALANRYLAALENGDD 480  
1106a PLEAGNAPLTVGVNSFGFGGTNAHIVLTEAPVSAVAVADDVPTSATQAARAPSAVLVTARSPNALGALANRYLAALENGDD 480  
668 SLEAGNAPLTVGVNSFGFGGTNAHIVLTEAPVSAAVADDVPTSATQAARAPFALVLTARSPNALGALANRYLAALENGDD 480  
1026b PLEAGNAPLTVGVNSFGFGGTNAHIVLTEAPVSAAVADDVPTSATQAARAPSAVLVTARSPNALGALANRYLAALENGDD 480  
BPC006 PLEAGNAPLTVGVNSFGFGGTNAHIVLTEAPVSAVAVADDVPTSATQAARAPSAVLVTARSPNALGALANRYLAALENGDD 480  
.....410.....420.....430.....440.....450.....460.....470.....480

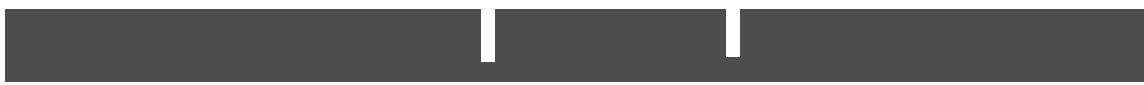

\*\*\*\*\*  
MSHR1043 WQALAAAAARRRQWLEHRAIVAPADAAEGRALAALARPAPEGGPSCVTTGRAPADAPRTALVFSGNGCQWVGMGNALYA 560  
MSHR1655 WQALAAAAARRRQWLEHRAIVAPADAAEGRALAALARPAPEGGPSCVTTGRAPADAPRTALVFSGNGCQWVGMGNALYA 560  
MSHR6686 WQALAAAAARRRQWLEHRAIVAPADAAEGRALAALARPAPEGGPSCVTTGRAPADAPRTALVFSGNGCQWVGMGNALYA 560  
K96243 WQALAAAAARRRQWLEHRAIVAPADAAEGRALAALARPAPEGGPSCVTTGRAPADAPRTALVFSGNGCQWVGMGNALYA 560  
1710b WQALAAAAARRRQWLEHRAIVAPADAAEGRALAALARPAPEGGPSCVTTGRAPADAPRTALVFSGNGCQWVGMGNALYA 560  
1106a WQALAAAAARRRQWLEHRAIVAPADAAEGRALAALARPAPEGGPSCVTTGRAPADAPRTALVFSGNGCQWVGMGNALYA 560  
668 WQALAAAAARRRQWLEHRAIVAPADAAEGRALAALARPAPEGGPSCVTTGRAPADAPRTALVFSGNGCQWVGMGNALYA 560  
1026b WQALAAAAARRRQWLEHRAIVAPADAAEGRALAALARPAPEGGPSCVTTGRAPADAPRTALVFSGNGCQWVGMGNALYA 560  
BPC006 WQALAAAAARRRQWLEHRAIVAPADAAEGRALAALARPAPEGGPSCVTTGRAPADAPRTALVFSGNGCQWVGMGNALYA 560  
.....490.....500.....510.....520.....530.....540.....550.....560



\*\*\*\*\*  
MSHR1043 EDAVFRAALDEVDALWCADGSPSLVDVMRGGPGAQWLAGAGAEWLAATENAPLLFAIQVGMIRVIDARGMRYDAAIGHS 640  
MSHR1655 EDAVFRAALDEVDALWCADGSPSLVDVMRGGPGAQWLAGAGAEWLAATENAPLLFAIQVGMIRVIDARGMRYDAAIGHS 640  
MSHR6686 EDAVFRAALDEVDALWCADGSPSLVDVMRGGPGAQWLAGAGAEWLAATENAPLLFAIQVGMIRVIDARGMRYDAAIGHS 640  
K96243 EDAVFRAALDEVDALWCADGSPSLVDVMRGGPGAQWLAGAGAEWLAATENAPLLFAIQVGMIRVIDARGMRYDAAIGHS 640  
1710b EDAVFRAALDEVDALWCADGSPSLVDVMRGGPGAQWLAGAGAEWLAATENAPLLFAIQVGMIRVIDARGMRYDAAIGHS 640  
1106a EDAVFRAALDEVDALWCADGSPSLVDVMRGGPGAQWLAGAGAEWLAATENAPLLFAIQVGMIRVIDARGMRYDAAIGHS 640  
668 EDAVFRAALDEVDALWCADGSPSLVDVMRGGPGAQWLAGAGAEWLAATENAPLLFAIQVGMIRVIDARGMRYDAAIGHS 640  
1026b EDAVFRAALDEVDALWCADGSPSLVDVMRGGPGAQWLAGAGAEWLAATENAPLLFAIQVGMIRVIDARGMRYDAAIGHS 640  
BPC006 EDAVFRAALDEVDALWCADGSPSLVDVMRGGPGAQWLAGAGAEWLAATENAPLLFAIQVGMIRVIDARGMRYDAAIGHS 640  
.....570.....580.....590.....600.....610.....620.....630.....640



\*\*\*\*\*  
MSHR1043 VGEVAAAQVVTGALSITDAVRVIKIRSRQAAMTRGCGRMAAVGIGDAAARELIARHGLARRVEIAGVNSPDAVTLAGEPOG 720  
MSHR1655 VGEVAAAQVVTGALSITDAVRVIKIRSRQAAMTRGCGRMAAVGIGDAAARELIARHGLARRVEIAGVNSPDAVTLAGEPOG 720  
MSHR6686 VGEVAAAQVVTGALSITDAVRVIKIRSRQAAMTRGCGRMAAVGIGDAAARELIARHGLARRVEIAGVNSPDAVTLAGEPOG 720  
K96243 VGEVAAAQVVTGALSITDAVRVIKIRSRQAAMTRGCGRMAAVGIGDAAARELIARHGLARRVEIAGVNSPDAVTLAGEPOG 720  
1710b VGEVAAAQVVTGALSITDAVRVIKIRSRQAAMTRGCGRMAAVGIGDAAARELIARHGLARRVEIAGVNSPDAVTLAGEPOG 720  
1106a VGEVAAAQVVTGALSITDAVRVIKIRSRQAAMTRGCGRMAAVGIGDAAARELIARHGLARRVEIAGVNSPDAVTLAGEPOG 720  
668 VGEVAAAQVVTGALSITDAVRVIKIRSRQAAMTRGCGRMAAVGIGDAAARELIARHGLARRVEIAGVNSPDAVTLAGEPOG 720  
1026b VGEVAAAQVVTGALSITDAVRVIKIRSRQAAMTRGCGRMAAVGIGDAAARELIARHGLARRVEIAGVNSPDAVTLAGEPOG 720  
BPC006 VGEVAAAQVVTGALSITDAVRVIKIRSRQAAMTRGCGRMAAVGIGDAAARELIARHGLARRVEIAGVNSPDAVTLAGEPOG 720  
.....650.....660.....670.....680.....690.....700.....710.....720



\*\*\*\*: \*\*\*\*\*  
MSHR1043 LOVLEAALRSGKFFQMLDLDYAFHSSHMDRIEPVVLAGLAGLRPQSGNGAFVSTVTGGALAGSELDAARYWWRNIREPVR 800  
MSHR1655 LOVLEAALRSGKFFQMLDLDYAFHSSHMDRIEPVVLAGLAGLRPQSGNGAFVSTVTGGALAGSELDAARYWWRNIREPVR 800  
MSHR6686 LOVLEAALRSGKFFQMLDLDYAFHSSHMDRIEPVVLAGLAGLRPQSGNGAFVSTVTGGALAGSELDAARYWWRNIREPVR 800  
K96243 LOVLEAALRSGKFFQMLDLDYAFHSSHMDRIEPVVLAGLAGLRPQSGNGAFVSTVTGGALAGSELDAARYWWRNIREPVR 800  
1710b LOVLEAALRSGKFFQMLDLDYAFHSSHMDRIEPVVLAGLAGLRPQSGNGAFVSTVTGGALAGSELDAARYWWRNIREPVR 800  
1106a LOVLEAALRSGKFFQMLDLDYAFHSSHMDRIEPVVLAGLAGLRPQSGNGAFVSTVTGGALAGSELDAARYWWRNIREPVR 800  
668 LOVLEAALRSGKFFQMLDLDYAFHSSHMDRIEPVVLAGLAGLRPQSGNGAFVSTVTGGALAGSELDAARYWWRNIREPVR 800  
1026b LOVLEAALRSGKFFQMLDLDYAFHSSHMDRIEPVVLAGLAGLRPQSGNGAFVSTVTGGALAGSELDAARYWWRNIREPVR 800  
BPC006 LOVLEAALRSGKFFQMLDLDYAFHSSHMDRIEPVVLAGLAGLRPQSGNGAFVSTVTGGALAGSELDAARYWWRNIREPVR 800  
.....730.....740.....750.....760.....770.....780.....790.....800

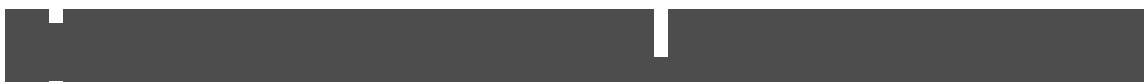

MSHR1043 FGDGIAHLIEQGVRLFVEVSPHSILRITYVKQALAAAGVTGVALPTLKRDHGSAATLRQAILAAIAHGASVDPDRFAPGAS 880  
MSHR1655 FGDGIAHLIEQGVRLFVEVSPHSILRITYVKQALAAAGVTGVALPTLKRDHGSAATLRQAILAAIAHGASVDPDRFAPGAS 880  
MSHR6686 FGDGIAHLIEQGVRLFVEVSPHSILRITYVKQALAAAGVTGVALPTLKRDHGSAATLRQAILAAIAHGASVDPDRFAPGAS 880  
K96243 FGDGIAHLIEQGVRLFVEVSPHSILRITYVKQALAAAGVTGVALPTLKRDHGSAATLRQAILAAIAHGASVDPDRFAPGAS 880  
1710b FGDGIAHLIEQGVRLFVEVSPHSILRITYVKQALAAAGVTGVALPTLKRDHGSAATLRQAILAAIAHGASVDPDRFAPGAS 880  
1106a FGDGIAHLIEQGVRLFVEVSPHSILRITYVKQALAAAGVTGVALPTLKRDHGSAATLRQAILAAIAHGASVDPDRFAPGAS 880  
668 FGDGIAHLIEQGVRLFVEVSPHSILRITYVKQALAAAGVTGVALPTLKRDHGSAATLRQAILAAIAHGASVDPDRFAPGAS 880  
1026b FGDGIAHLIEQGVRLFVEVSPHSILRITYVKQALAAAGVTGVALPTLKRDHGSAATLRQAILAAIAHGASVDPDRFAPGAS 880  
BPC006 FGDGIAHLIEQGVRLFVEVSPHSILRITYVKQALAAAGVTGVALPTLKRDHGSAATLRQAILAAIAHGASVDPDRFAPGAS 880  
.....810.....820.....830.....840.....850.....860.....870.....880

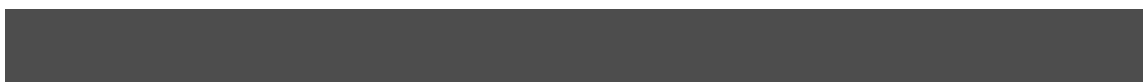

MSHR1043 RAALPSYPWORERFWLTPIVEGYGLVNRREHPLLGYRLHEHAFAWENQLDPAKLPMLADHVVDGGVAFPGAGYVEMALA 960  
MSHR1655 RAALPSYPWORERFWLTPIVEGYGLVNRREHPLLGYRLHEHAFAWENQLDPAKLPMLADHVVDGGVAFPGAGYVEMALA 960  
MSHR6686 RAALPSYPWORERFWLTPIVEGYGLVNRREHPLLGYRLHEHAFAWENQLDPAKLPMLADHVVDGGVAFPGAGYVEMALA 960  
K96243 RAALPSYPWORERFWLTPIVEGYGLVNRREHPLLGYRLHEHAFAWENQLDPAKLPMLADHVVDGGVAFPGAGYVEMALA 960  
1710b RAALPSYPWORERFWLTPIVEGYGLVNRREHPLLGYRLHEHAFAWENQLDPAKLPMLADHVVDGGVAFPGAGYVEMALA 960  
1106a RAALPSYPWORERFWLTPIVEGYGLVNRREHPLLGYRLHEHAFAWENQLDPAKLPMLADHVVDGGVAFPGAGYVEMALA 960  
668 RAALPSYPWORERFWLTPIVEGYGLVNRREHPLLGYRLHEHAFAWENQLDPAKLPMLADHVVDGGVAFPGAGYVEMALA 960  
1026b RAALPSYPWORERFWLTPIVEGYGLVNRREHPLLGYRLHEHAFAWENQLDPAKLPMLADHVVDGGVAFPGAGYVEMALA 960  
BPC006 RAALPSYPWORERFWLTPIVEGYGLVNRREHPLLGYRLHEHAFAWENQLDPAKLPMLADHVVDGGVAFPGAGYVEMALA 960  
.....890.....900.....910.....920.....930.....940.....950.....960

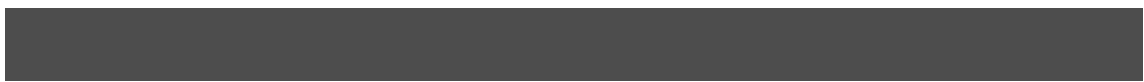

MSHR1043 AACAFFDTPDAALENVEIRMPVVFQPOQAKLFRLLVIEPRATFTIETDRMSDGAWTLNVTGRMLESIGNALGAASVVPSPD 1040  
MSHR1655 AACAFFDTPDAALENVEIRMPVVFQPOQAKLFRLLVIEPRATFTIETDRMSDGAWTLNVTGRMLESIGNALGAASVVPSPD 1040  
MSHR6686 AACAFFDTPDAALENVEIRMPVVFQPOQAKLFRLLVIEPRATFTIETDRMSDGAWTLNVTGRMLESIGNALGAASVVPSPD 1040  
K96243 AACAFFDTPDAALENVEIRMPVVFQPOQAKLFRLLVIEPRATFTIETDRMSDGAWTLNVTGRMLESIGNALGAASVVPSPD 1040  
1710b AACAFFDTPDAALENVEIRMPVVFQPOQAKLFRLLVIEPRATFTIETDRMSDGAWTLNVTGRMLESIGNALGAASVVPSPD 1040  
1106a AACAFFDTPDAALENVEIRMPVVFQPOQAKLFRLLVIEPRATFTIETDRMSDGAWTLNVTGRMLESIGNALGAASVVPSPD 1040  
668 AACAFFDTPDAALENVEIRMPVVFQPOQAKLFRLLVIEPRATFTIETDRMSDGAWTLNVTGRMLESIGNALGAASVVPSPD 1040  
1026b AACAFFDTPDAALENVEIRMPVVFQPOQAKLFRLLVIEPRATFTIETDRMSDGAWTLNVTGRMLESIGNALGAASVVPSPD 1040  
BPC006 AACAFFDTPDAALENVEIRMPVVFQPOQAKLFRLLVIEPRATFTIETDRMSDGAWTLNVTGRMLESIGNALGAASVVPSPD 1040  
.....970.....980.....990.....1000.....1010.....1020.....1030.....1040

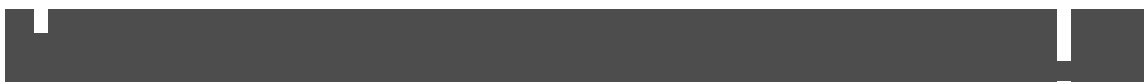

MSHR1043 MLERLLALPAAHGDMLYANTAAIGLGYGPAFRWVRTVVAEGDDAALADVAAPDACGDARTLSAYRLHPALMDSGFHPLF 1120  
MSHR1655 MLERLLALPAAHGDMLYANTAAIGLGYGPAFRWVRTVVAEGDDAALADVAAPDACGDARTLSAYRLHPALMDSGFHPLF 1120  
MSHR6686 MLERLLALPAAHGDMLYANTAAIGLGYGPAFRWVRTVVAEGDDAALADVAAPDACGDARTLSAYRLHPALMDSGFHPLF 1120  
K96243 MLERLLALPAAHGDMLYANTAAIGLGYGPAFRWVRTVVAEGDDAALADVAAPDACGDARTLSAYRLHPALMDSGFHPLF 1120  
1710b MLERLLALPAADGDMLYANTAAIGLGYGPAFRWVRTVVAEGDDAALADVAAPDACGDARTLSAYRLHPALMDSGFHPLF 1120  
1106a MLERLLALPAADGDMLYANTAAIGLGYGPAFRWVRTVVAEGDDAALADVAAPDACGDARTLSAYRLHPALMDSGFHPLF 1120  
668 MLERLLALPAADGDMLYANTAAIGLGYGPAFRWVRTVVAEGDDAALADVAAPDACGDARTLSAYRLHPALMDSGFHPLF 1120  
1026b MLERLLALPAADGDMLYANTAAIGLGYGPAFRWVRTVVAEGDDAALADVAAPDACGDARTLSAYRLHPALMDSGFHPLF 1120  
BPC006 MLERLLALPAADGDMLYANTAAIGLGYGPAFRWVRTVVAEGDDAALADVAAPDACGDARTLSAYRLHPALMDSGFHPLF 1120  
.....1050.....1060.....1070.....1080.....1090.....1100.....1110.....1120

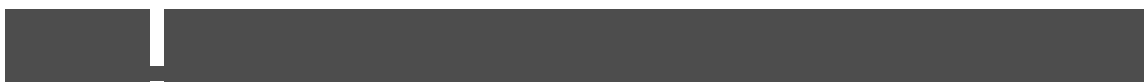

MSHR1043 ALLAAHARDGEHPAYVPVQIGRVDYLRGDTVAVRLARIDRRSPHSIVAHFEFLDAQGAIIVARLGACRFRFVLDVGRRONL 1200  
MSHR1655 ALLAAHARDGEHPAYVPVQIGRVDYLRGDTVAVRLARIDRRSPHSIVAHFEFLDAQGAIIVARLGACRFRFVLDVGRRONL 1200  
MSHR6686 ALLAAHARDGEHPAYVPVQIGRVDYLRGDTVAVRLARIDRRSPHSIVAHFEFLDAQGAIIVARLGACRFRFVLDVGRRONL 1200  
K96243 ALLAAHARDGEHPAYVPVQIGRVDYLRGDTVAVRLARIDRRSPHSIVAHFEFLDAQGAIIVARLGACRFRFVLDVGRRONL 1200  
1710b ALLAAHARDGEHPAYVPVQIGRVDYLRGDTVAVRLARIDRRSPHSIVAHFEFLDAQGAIIVARLGACRFRFVLDVGRRONL 1200  
1106a ALLAAHARDGEHPAYVPVQIGRVDYLRGDTVAVRLARIDRRSPHSIVAHFEFLDAQGAIIVARLGACRFRFVLDVGRRONL 1200  
668 ALLAAHARDGEHPAYVPVQIGRVDYLRGDTVAVRLARIDRRSPHSIVAHFEFLDAQGAIIVARLGACRFRFVLDVGRRONL 1200  
1026b ALLAAHARDGEHPAYVPVQIGRVDYLRGDTVAVRLARIDRRSPHSIVAHFEFLDAQGAIIVARLGACRFRFVLDVGRRONL 1200  
BPC006 ALLAAHARDGEHPAYVPVQIGRVDYLRGDTVAVRLARIDRRSPHSIVAHFEFLDAQGAIIVARLGACRFRFVLDVGRRONL 1200  
.....1130.....1140.....1150.....1160.....1170.....1180.....1190.....1200

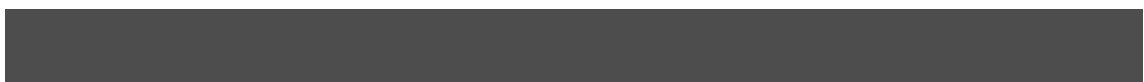

\*\*\*\*\*  
MSHR1043 PARFVYRL EAMPLPGDVDAAGLPAPDALLARAVARLDAGHDGRRTRHLEILPLLDVLA SLVVLQAFDALGAFAGTWRPA 1280  
MSHR1655 PARFVYRL EAMPLPGDVDAAGLPAPDALLARAVARLDAGHDGRRTRHLEILPLLDVLA SLVVLQAFDALGAFAGTWRPA 1280  
MSHR6686 PARFVYRL EAMPLPGDVDAAGLPAPDALLARAVARLDAGHDGRRTRHLEILPLLDVLA SLVVLQAFDALGAFAGTWRPA 1280  
K96243 PARFVYRL EAMPLPGDVDAAGLPAPDALLARAVARLDAGHDGRRTRHLEILPLLDVLA SLVVLQAFDALGAFAGTWRPA 1280  
1710b PARFVYRL EAMPLPGDVDAAGLPAPDALLARAVARLDAGHDGRRTRHLEILPLLDVLA SLVVLQAFDALGAFAGTWRPA 1280  
1106a PARFVYRL EAMPLPGDVDAAGLPAPDALLARAVARLDAGHDGRRTRHLEILPLLDVLA SLVVLQAFDALGAFAGTWRPA 1280  
668 PARFVYRL EAMPLPGDVDAAGLPAPDALLARAVARLDAGHDGRRTRHLEILPLLDVLA SLVVLQAFDALGAFAGTWRPA 1280  
1026b PARFVYRL EAMPLPGDVDAAGLPAPDALLARAVARLDAGHDGRRTRHLEILPLLDVLA SLVVLQAFDALGAFAGTWRPA 1280  
BPC006 PARFVYRL EAMPLPGDVDAAGLPAPDALLARAVARLDAGHDGRRTRHLEILPLLDVLA SLVVLQAFDALGAFAGTWRPA 1280  
.....1210.....1220.....1230.....1240.....1250.....1260.....1270.....1280

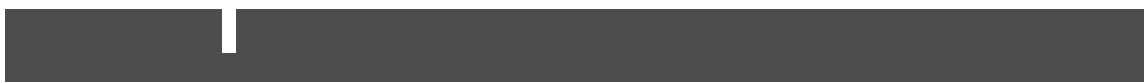

\*\*\*\*\*;\*\*\*\*\*  
MSHR1043 HGCAALAA RLADMLVEDGLAHRDGDRLVRDDAA CAALPPLDELWLRGLLAE SPAHVAEL TLLAHCGSALPGVLSGAKDGTR 1360  
MSHR1655 HGCAALAA RLADMLVEDGLAHRDGDRLVRDDAA CAALPPLDELWLRGLLAE SPAHVAEL TLLAHCGSALPGVLSGAKDGTR 1360  
MSHR6686 HGCAALAA RLADMLVEDGLAHRDGDRLVRDDAA CAALPPLDELWLRGLLAE SPAHVAEL TLLAHCGSALPGVLSGAKDGTR 1360  
K96243 HGCAALAA RLADMLVEDGLAHRDGDRLVRDDAA CAALPPLDELWLRGLLAE SPAHVAEL TLLAHCGSALPGVLSGAKDGTR 1360  
1710b HGCAALAA RLADMLVEDGLAHRDGDRLVRDDAA CAALPPLDELWLRGLLAE SPAHVAEL TLLAHCGSALPGVLSGAKDGTR 1360  
1106a HGCAALAA RLADMLVEDGLAHRDGDRLVRDDAA CAALPPLDELWLRGLLAE SPAHVAEL TLLAHCGSALPGVLSGAKDGTR 1360  
668 HGCAALAA RLADMLVEDGLAHRDGDRLVRDDAA CAALPPLDELWLRGLLAE SPAHVAEL TLLAHCGSALPGVLSGAKDGTR 1360  
1026b HGCAALAA RLADMLVEDGLAHRDGDRLVRDDAA CAALPPLDELWLRGLLAE SPAHVAEL TLLAHCGSALPGVLSGAKDGTR 1360  
BPC006 HGCAALAA RLADMLVEDGLAHRDGDRLVRDDAA CAALPPLDELWLRGLLAE SPAHVAEL TLLAHCGSALPGVLSGAKDGTR 1360  
.....1290.....1300.....1310.....1320.....1330.....1340.....1350.....1360

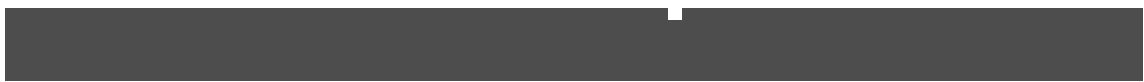

\*\*\*\*\*  
MSHR1043 LLSP TGHSLVEHLLAASPTWQH VYALLTASVEQAVDAWQPARRLRVLELGATDGDVLOTLMH LAPARCDHTIAATAGQL 1440  
MSHR1655 LLSP TGHSLVEHLLAASPTWQH VYALLTASVEQAVDAWQPARRLRVLELGATDGDVLOTLMH LAPARCDHTIAATAGQL 1440  
MSHR6686 LLSP TGHSLVEHLLAASPTWQH VYALLTASVEQAVDAWQPARRLRVLELGATDGDVLOTLMH LAPARCDHTIAATAGQL 1440  
K96243 LLSP TGHSLVEHLLAASPTWQH VYALLTASVEQAVDAWQPARRLRVLELGATDGDVLOTLMH LAPARCDHTIAATAGQL 1440  
1710b LLSP TGHSLVEHLLAASPTWQH VYALLTASVEQAVDAWQPARRLRVLELGATDGDVLOTLMH LAPARCDHTIAATAGQL 1440  
1106a LLSP TGHSLVEHLLAASPTWQH VYALLTASVEQAVDAWQPARRLRVLELGATDGDVLOTLMH LAPARCDHTIAATAGQL 1440  
668 LLSP TGHSLVEHLLAASPTWQH VYALLTASVEQAVDAWQPARRLRVLELGATDGDVLOTLMH LAPARCDHTIAATAGQL 1440  
1026b LLSP TGHSLVEHLLAASPTWQH VYALLTASVEQAVDAWQPARRLRVLELGATDGDVLOTLMH LAPARCDHTIAATAGQL 1440  
BPC006 LLSP TGHSLVEHLLAASPTWQH VYALLTASVEQAVDAWQPARRLRVLELGATDGDVLOTLMH LAPARCDHTIAATAGQL 1440  
.....1370.....1380.....1390.....1400.....1410.....1420.....1430.....1440



\*\*\*\*\*  
MSHR1043 AGFGADAQAAVTTVALQ PGERLSLA ADEAGPYDVIVANRALS GRRDVADALNAMRSWLAPGG LLLLLAESRRGRFS DIVFG 1520  
MSHR1655 AGFGADAQAAVTTVALQ PGERLSLA ADEAGPYDVIVANRALS GRRDVADALNAMRSWLAPGG LLLLLAESRRGRFS DIVFG 1520  
MSHR6686 AGFGADAQAAVTTVALQ PGERLSLA ADEAGPYDVIVANRALS GRRDVADALNAMRSWLAPGG LLLLLAESRRGRFS DIVFG 1520  
K96243 AGFGADAQAAVTTVALQ PGERLSLA ADEAGPYDVIVANRALS GRRDVADALNAMRSWLAPGG LLLLLAESRRGRFS DIVFG 1520  
1710b AGFGADAQAAVTTVALQ PGERLSLA ADEAGPYDVIVANRALS GRRDVADALNAMRSWLAPGG LLLLLAESRRGRFS DIVFG 1520  
1106a AGFGADAQAAVTTVALQ PGERLSLA ADEAGPYDVIVANRALS GRRDVADALNAMRSWLAPGG LLLLLAESRRGRFS DIVFG 1520  
668 AGFGADAQAAVTTVALQ PGERLSLA ADEAGPYDVIVANRALS GRRDVADALNAMRSWLAPGG LLLLLAESRRGRFS DIVFG 1520  
1026b AGFGADAQAAVTTVALQ PGERLSLA ADEAGPYDVIVANRALS GRRDVADALNAMRSWLAPGG LLLLLAESRRGRFS DIVFG 1520  
BPC006 AGFGADAQAAVTTVALQ PGERLSLA ADEAGPYDVIVANRALS GRRDVADALNAMRSWLAPGG LLLLLAESRRGRFS DIVFG 1520  
.....1450.....1460.....1470.....1480.....1490.....1500.....1510.....1520



\*\*\*\*\*  
MSHR1043 MQAPSTQTDAPAPLAPADLEAALAHAGYVGVVRHVEQSLDLEGT PMFVIARNPASAVAAPS GGDSSDDLTLARSEQWLVL 1600  
MSHR1655 MQAPSTQTDAPAPLAPADLEAALAHAGYVGVVRHVEQSLDLEGT PMFVIARNPASAVAAPS GGDSSDDLTLARSEQWLVL 1600  
MSHR6686 MQAPSTQTDAPAPLAPADLEAALAHAGYVGVVRHVEQSLDLEGT PMFVIARNPASAVAAPS GGDSSDDLTLARSEQWLVL 1600  
K96243 MQAPSTQTDAPAPLAPADLEAALAHAGYVGVVRHVEQSLDLEGT PMFVIARNPASAVAAPS GGDSSDDLTLARSEQWLVL 1600  
1710b MQAPSTQTDAPAPLAPADLEAALAHAGYVGVVRHVEQSLDLEGT PMFVIARNPASAVAAPS GGDSSDDLTLARSEQWLVL 1600  
1106a MQAPSTQTDAPAPLAPADLEAALAHAGYVGVVRHVEQSLDLEGT PMFVIARNPASAVAAPS GGDSSDDLTLARSEQWLVL 1600  
668 MQAPSTQTDAPAPLAPADLEAALAHAGYVGVVRHVEQSLDLEGT PMFVIARNPASAVAAPS GGDSSDDLTLARSEQWLVL 1600  
1026b MQAPSTQTDAPAPLAPADLEAALAHAGYVGVVRHVEQSLDLEGT PMFVIARNPASAVAAPS GGDSSDDLTLARSEQWLVL 1600  
BPC006 MQAPSTQTDAPAPLAPADLEAALAHAGYVGVVRHVEQSLDLEGT PMFVIARNPASAVAAPS GGDSSDDLTLARSEQWLVL 1600  
.....1530.....1540.....1550.....1560.....1570.....1580.....1590.....1600



MSHR1043 HAPDVVGGFGARLADALAHAGYPADIVEITHAADAIASLPAGQPAHVVFCAPEPLAEAAATGDDLMAAQRNGVIALAALV 1680  
MSHR1655 HAPDVVGGFGARLADALAHAGYPADIVEITHAADAIASLPAGQPAHVVFCAPEPLAEAAATGDDLMAAQRNGVIALAALV 1680  
MSHR6686 HAPDVVGGFGARLADALAHAGYPADIVEITHAADAIASLPAGQPAHVVFCAPEPLAEAAATGDDLMAAQRNGVIALAALV 1680  
K96243 HAPDVVGGFGARLADALAHAGYPADIVEITHAADAIASLPAGQPAHVVFCAPEPLAEAAATGDDLMAAQRNGVIALAALV 1680  
1710b HAPDVVGGFGARLADALAHAGYPADIVEITHAADAIASLPAGQPAHVVFCAPEPLAEAAATGDDLMAAQRNGVIALAALV 1680  
1106a HAPDVVGGFGARLADALAHAGYPADIVEITHAADAIASLPAGQPAHVVFCAPEPLAEAAATGDDLMAAQRNGVIALAALV 1680  
668 HAPDVVGGFGARLADALAHAGYPADIVEITHAADAIASLPAGQPAHVVFCAPEPLAEAAATGDDLMAAQRNGVIALAALV 1680  
1026b HAPDVVGGFGARLADALAHAGYPADIVEITHAADAIASLPAGQPAHVVFCAPEPLAEAAATGDDLMAAQRNGVIALAALV 1680  
BPC006 HAPDVVGGFGARLADALAHAGYPADIVEITHAADAIASLPAGQPAHVVFCAPEPLAEAAATGDDLMAAQRNGVIALAALV 1680  
.....1610.....1620.....1630.....1640.....1650.....1660.....1670.....1680

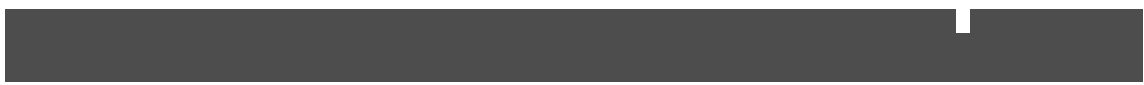

MSHR1043 RVLGAQPNATTRLTIVTRGGAPFAGTAHAHPEQATLWGLGRVLANEHPPELACRLIDVDCAADRIPEALIRELTGAALEEE 1760  
MSHR1655 RVLGAQPNATTRLTIVTRGGAPFAGTAHAHPEQATLWGLGRVLANEHPPELACRLIDVDCAADRIPEALIRELTGAALEEE 1760  
MSHR6686 RVLGAQPNATTRLTIVTRGGAPFAGTAHAHPEQATLWGLGRVLANEHPPELACRLIDVDCAADRIPEALIRELTGAALEEE 1760  
K96243 RVLGAQPNATTRLTIVTRGGAPFAGTAHAHPEQATLWGLGRVLANEHPPELACRLIDVDCAADRIPEALIRELTGAALEEE 1760  
1710b RVLGAQPNATTRLTIVTRGGAPFAGTAHAHPEQATLWGLGRVLANEHPPELACRLIDVDCAADRIPEALIRELTGAALEEE 1760  
1106a RVLGAQPNATTRLTIVTRGGAPFAGTAHAHPEQATLWGLGRVLANEHPPELACRLIDVDCAADRIPEALIRELTGAALEEE 1760  
668 RVLGAQPNATTRLTIVTRGGAPFAGTAHAHPEQATLWGLGRVLANEHPPELACRLIDVDCAADRIPEALIRELTGAALEEE 1760  
1026b RVLGAQPNATTRLTIVTRGGAPFAGTAHAHPEQATLWGLGRVLANEHPPELACRLIDVDCAADRIPEALIRELTGAALEEE 1760  
BPC006 RVLGAQPNATTRLTIVTRGGAPFAGTAHAHPEQATLWGLGRVLANEHPPELACRLIDVDCAADRIPEALIRELTGAALEEE 1760  
.....1690.....1700.....1710.....1720.....1730.....1740.....1750.....1760

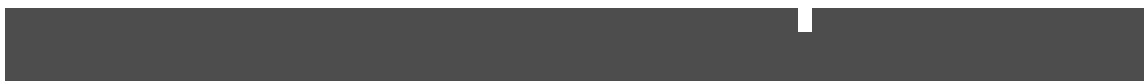

MSHR1043 VVLGAHGRVPRMLTAAQDAARNDGAIARA AVLAFDAPGSLRNLEWFALAESALGADEVEIEPVATGLNFRDVMYAMGLL 1840  
MSHR1655 VVLGAHGRVPRMLTAAQDAARNDGAIARA AVLAFDAPGSLRNLEWFALAESALGADEVEIEPVATGLNFRDVMYAMGLL 1840  
MSHR6686 VVLGAHGRVPRMLTAAQDAARNDGAIARA AVLAFDAPGSLRNLEWFALAESALGADEVEIEPVATGLNFRDVMYAMGLL 1840  
K96243 VVLGAHGRVPRMLTAAQDAARNDGAIARA AVLAFDAPGSLRNLEWFALAESALGADEVEIEPVATGLNFRDVMYAMGLL 1840  
1710b VVLGAHGRVPRMLTAAQDAARNDGAIARA AVLAFDAPGSLRNLEWFALAESALGADEVEIEPVATGLNFRDVMYAMGLL 1840  
1106a VVLGAHGRVPRMLTAAQDAARNDGAIARA AVLAFDAPGSLRNLEWFALAESALGADEVEIEPVATGLNFRDVMYAMGLL 1840  
668 VVLGAHGRVPRMLTAAQDAARNDGAIARA AVLAFDAPGSLRNLEWFALAESALGADEVEIEPVATGLNFRDVMYAMGLL 1840  
1026b VVLGAHGRVPRMLTAAQDAARNDGAIARA AVLAFDAPGSLRNLEWFALAESALGADEVEIEPVATGLNFRDVMYAMGLL 1840  
BPC006 VVLGAHGRVPRMLTAAQDAARNDGAIARA AVLAFDAPGSLRNLEWFALAESALGADEVEIEPVATGLNFRDVMYAMGLL 1840  
.....1770.....1780.....1790.....1800.....1810.....1820.....1830.....1840

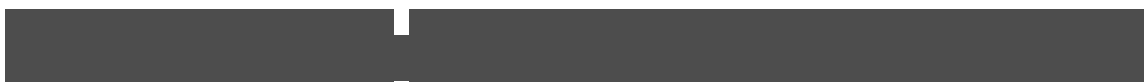

MSHR1043 SDEAVETGFAGATIGMELSGRVVVRVGS AVTEFAPGDAILGFAPASFATRVRARRRRSRNP SACRSRRRRP CRPRSSPRI 1920  
MSHR1655 SDEAVETGFAGATIGMELSGRVVVRVGS AVTEFAPGDAILGFAPASFATRVRARRRRSRNP SACRSRRRRP CRPRSSPRI 1920  
MSHR6686 SDEAVETGFAGATIGMELSGRVVVRVGS AVTEFAPGDAILGFAPASFATRVRARRRRSRNP SACRSRRRRP CRPRSSPRI 1920  
K96243 SDEAVETGFAGATIGMELSGRVVVRVGS AVTEFAPGDAILGFAPASFATRVRRAQAIAPKPERLSFEEAATVPTTFFFTAY 1920  
1710b SDEAVETGFAGATIGMELSGRVVVRVGS AVTEFAPGDAILGFAPASFATRVRRAQAIAPKPERLSFEEAATVPTTFFFTAY 1920  
1106a SDEAVETGFAGATIGMELSGRVVVRVGS AVTEFAPGDAILGFAPASFATRVRRAQAIAPKPERLSFEEAATVPTTFFFTAY 1920  
668 SDEAVETGFAGATIGMELSGRVVVRVGS AVTEFAPGDAILGFAPASFATRVRRAQAIAPKPERLSFEEAATVPTTFFFTAY 1920  
1026b SDEAVETGFAGATIGMELSGRVVVRVGS AVTEFAPGDAILGFAPASFATRVRRAQAIAPKPERLSFEEAATVPTTFFFTAY 1920  
BPC006 SDEAVETGFAGATIGMELSGRVVVRVGS AVTEFAPGDAILGFAPASFATRVRRAQAIAPKPERLSFEEAATVPTTFFFTAY 1920  
.....1850.....1860.....1870.....1880.....1890.....1900.....1910.....1920

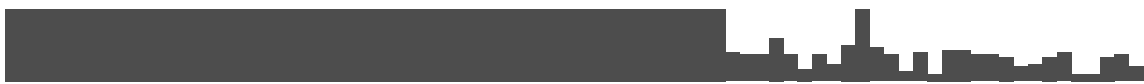

MSHR1043 TRSSNSRGC AAASACS YMAARAASG SRRSSSRAT SARKCSRRAVTRSSASSCACSVPTTCSIRA AAWRSRTRFAR 1994  
MSHR1655 TRSSNSRGC AAASACS YMAARAASG SRRSSSRAT SARKCSRRAVTRSSASSCACSVPTTCSIRA AAWRSRTRFAR 1994  
MSHR6686 TRSSNSRGC AAASACS YMAARAASG SRRSSSRAT SARKCSRRAVTRSSASSCACSVPTTCSIRA AAWRSRTRFAR 1994  
K96243 YALVELARLRRGERVLVHGAGGVGIAA IQLARYFGAEVFATAGSDEKREFVRLLGADHVLD SRSLAFADEIRAMTGGEG 2000  
1710b YALVELARLRRGERVLVHGAGGVGIAA IQLARYFGAEVFATAGSDEKREFVRLLGADHVLD SRSLAFADEIRAMTGGEG 2000  
1106a YALVELARLRRGERVLVHGAGGVGIAA IQLARYFGAEVFATAGSDEKREFVRLLGADHVLD SRSLAFADEIRAMTGGEG 2000  
668 YALVELARLRRGERVLVHGAGGVGIAA IQLARYFGAEVFATAGSDEKREFVRLLGADHVLD SRSLAFADEIRAMTGGEG 2000  
1026b YALVELARLRRGERVLVHGAGGVGIAA IQLARYFGAEVFATAGSDEKREFVRLLGADHVLD SRSLAFADEIRAMTGGEG 2000  
BPC006 YALVELARLRRGERVLVHGAGGVGIAA IQLARYFGAEVFATAGSDEKREFVRLLGADHVLD SRSLAFADEIRAMTGGEG 2000  
.....1930.....1940.....1950.....1960.....1970.....1980.....1990.....2000

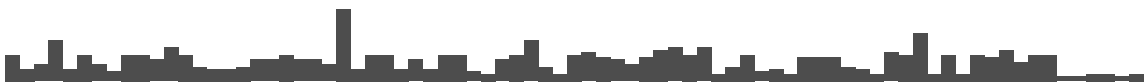

MSHR1043 1994  
MSHR1655 1994  
MSHR6686 1994  
K96243 IDIVLNSLAGEAMVRSIDTLRPFGRFLELGKRDFYENSHIGLRPFRNNISYFGIDADQLMGALPELTARLFGDVMGLFAA 2080  
1710b IDIVLNSLAGEAMVRSIDTLRPFGRFLELGKRDFYENSHIGLRPFRNNISYFGIDADQLMGALPELTARLFGDVMGLFAA 2080  
1106a IDIVLNSLAGEAMVRSIDTLRPFGRFLELGKRDFYENSHIGLRPFRNNISYFGIDADQLMGALPELTARLFGDVMGLFAA 2080  
668 IDIVLNSLAGEAMVRSIDTLRPFGRFLELGKRDFYENSHIGLRPFRNNISYFGIDADQLMGALPELTARLFGDVMGLFAA 2080  
1026b IDIVLNSLAGEAMVRSIDTLRPFGRFLELGKRDFYENSHIGLRPFRNNISYFGIDADQLMGALPELTARLFGDVMGLFAA 2080  
BPC006 IDIVLNSLAGEAMVRSIDTLRPFGRFLELGKRDFYENSHIGLRPFRNNISYFGIDADQLMGALPELTARLFGDVMGLFAA 2080  
.....2010.....2020.....2030.....2040.....2050.....2060.....2070.....2080

---

MSHR1043 1994  
MSHR1655 1994  
MSHR6686 1994  
K96243 GVLHPLPYRAFFAERAEDAFRYMQQARQIGKVLVITYPCGTPAPTHGAARADSLALDPHGAYLVVGGTGGGLGFASARWMVE 2160  
1710b GVLHPLPYRAFFAERAEDAFRYMQQARQIGKVLVITYPCGTPAPTHGAARADSLALDPHGAYLVVGGTGGGLGFASARWMVE 2160  
1106a GVLHPLPYRAFFAERAEDAFRYMQQARQIGKVLVITYPCGTPAPTHGAARADSLALDPHGAYLVVGGTGGGLGFASARWMVE 2160  
668 GVLHPLPYRAFFAERAEDAFRYMQQARQIGKVLVITYPCGTPAPTHGAARADSLALDPHGAYLVVGGTGGGLGFASARWMVE 2160  
1026b GVLHPLPYRAFFAERAEDAFRYMQQARQIGKVLVITYPCGTPAPTHGAARADSLALDPHGAYLVVGGTGGGLGFASARWMVE 2160  
BPC006 GVLHPLPYRAFFAERAEDAFRYMQQARQIGKVLVITYPCGTPAPTHGAARADSLALDPHGAYLVVGGTGGGLGFASARWMVE 2160  
.....2090.....2100.....2110.....2120.....2130.....2140.....2150.....2160

---

MSHR1043 1994  
MSHR1655 1994  
MSHR6686 1994  
K96243 RGARRLTLASRSGELAVAAARDEIECWRAITLGVAVDIVSCDVTDAAAVDAMIAAIVRRDIPKGVLSAMAIIDDGLVRNLD 2240  
1710b RGARRLTLASRSGELAVAAARDEIECWRAITLGVAVDIVSCDVTDAAAVDAMIAAIVRRDIPKGVLSAMAIIDDGLVRNLD 2240  
1106a RGARRLTLASRSGELAVAAARDEIECWRAITLGVAVDIVSCDVTDAAAVDAMIAAIVRRDIPKGVLSAMAIIDDGLVRNLD 2240  
668 RGARRLTLASRSGELAVAAARDEIECWRAITLGVAVDIVSCDVTDAAAVDAMIAAIVRRDIPKGVLSAMAIIDDGLVRNLD 2240  
1026b RGARRLTLASRSGELAVAAARDEIECWRAITLGVAVDIVSCDVTDAAAVDAMIAAIVRRDIPKGVLSAMAIIDDGLVRNLD 2240  
BPC006 RGARRLTLASRSGELAVAAARDEIECWRAITLGVAVDIVSCDVTDAAAVDAMIAAIVRRDIPKGVLSAMAIIDDGLVRNLD 2240  
.....2170.....2180.....2190.....2200.....2210.....2220.....2230.....2240

---

MSHR1043 1994  
MSHR1655 1994  
MSHR6686 1994  
K96243 DARMAAVLAPKVAGAWNLHRATRSPLDLFVVYSSATTYLGPNPQSNYVAANSFLEALVEHRAAGLPGTFMAWGPLEDV 2320  
1710b DARMAAVLAPKVAGAWNLHRATRSPLDLFVVYSSATTYLGPNPQSNYVAANSFLEALVEHRAAGLPGTFMAWGPLEDV 2320  
1106a DARMAAVLAPKVAGAWNLHRATRSPLDLFVVYSSATTYLGPNPQSNYVAANSFLEALVEHRAAGLPGTFMAWGPLEDV 2320  
668 DARMAAVLAPKVAGAWNLHRATRSPLDLFVVYSSATTYLGPNPQSNYVAANSFLEALVEHRAAGLPGTFMAWGPLEDV 2320  
1026b DARMAAVLAPKVAGAWNLHRATRSPLDLFVVYSSATTYLGPNPQSNYVAANSFLEALVEHRAAGLPGTFMAWGPLEDV 2320  
BPC006 DARMAAVLAPKVAGAWNLHRATRSPLDLFVVYSSATTYLGPNPQSNYVAANSFLEALVEHRAAGLPGTFMAWGPLEDV 2320  
.....2250.....2260.....2270.....2280.....2290.....2300.....2310.....2320

---

MSHR1043 1994  
MSHR1655 1994  
MSHR6686 1994  
K96243 GFLARHADTREALQSRI GGASITSGEAMIALERALVAGAAGEAVVRLDWHAVARGMPAAKARRYSLLQSHANGGDARDGG 2400  
1710b GFLARHADTREALQSRI GGASITSGEAMIALERALVAGAAGEAVVRLDWHAVARGMPAAKARRYSLLQSHANGGDARDGG 2400  
1106a GFLARHADTREALQSRI GGASITSGEAMIALERALVAGAAGEAVVRLDWHAVARGMPAAKARRYSLLQSHANGGDARDGG 2400  
668 GFLARHADTREALQSRI GGASITSGEAMIALERALVAGAAGEAVVRLDWHAVARGMPAAKARRYSLLQSHANGGDARDGG 2400  
1026b GFLARHADTREALQSRI GGASITSGEAMIALERALVAGAAGEAVVRLDWHAVARGMPAAKARRYSLLQSHANGGDARDGG 2400  
BPC006 GFLARHADTREALQSRI GGASITSGEAMIALERALVAGAAGEAVVRLDWHAVARGMPAAKARRYSLLQSHANGGDARDGG 2400  
.....2330.....2340.....2350.....2360.....2370.....2380.....2390.....2400

---

|          |                                                                                   |      |
|----------|-----------------------------------------------------------------------------------|------|
| MSHR1043 |                                                                                   | 1994 |
| MSHR1655 |                                                                                   | 1994 |
| MSHR6686 |                                                                                   | 1994 |
| K96243   | TQLREEVLALPRDEAIALVAGTLQAQIARILHMTPDRIALDKSVLDMGMDSLMGMEGLGLAVEEAFEVKLSVMAIAEGASA | 2480 |
| 1710b    | TQLREEVLALPRDEAIALVAGTLQAQIARILHMTPDRIALDKSVLDMGMDSLMGMEGLGLAVEEAFEVKLSVMAIAEGASA | 2480 |
| 1106a    | TQLREEVLALPRDEAIALVAGTLQAQIARILHMTPDRIALDKSVLDMGMDSLMGMEGLGLAVEEAFEVKLSVMAIAEGASA | 2480 |
| 668      | TQLREEVLALPRDEAIALVAGTLQAQIARILHMTPDRIALDKSVLDMGMDSLMGMEGLGLAVEEAFEVKLSVMAIAEGASA | 2480 |
| 1026b    | TQLREEVLALPRDEAIALVAGTLQAQIARILHMTPDRIALDKSVLDMGMDSLMGMEGLGLAVEEAFEVKLSVMAIAEGASA | 2480 |
| BPC006   | TQLREEVLALPRDEAIALVAGTLQAQIARILHMTPDRIALDKSVLDMGMDSLMGMEGLGLAVEEAFEVKLSVMAIAEGASA | 2480 |
|          | .....2410.....2420.....2430.....2440.....2450.....2460.....2470.....2480          |      |

---

|          |                                                                     |      |
|----------|---------------------------------------------------------------------|------|
| MSHR1043 |                                                                     | 1994 |
| MSHR1655 |                                                                     | 1994 |
| MSHR6686 |                                                                     | 1994 |
| K96243   | MTLAGRIVDSIGASADAGAGAAADSAHEAVAALAAKHAIDGDARAVLDIRPAPVAGQVSPITLEVAR | 2546 |
| 1710b    | MTLAGRIVDSIGASADAGAGAAADSAHEAVAALAAKHAIDGDARAVLDIRPAPVAGQVSPITLEVAR | 2546 |
| 1106a    | MTLAGRIVDSIGASADAGAGAAADSAHEAVAALAAKHAIDGDARAVLDIRPAPVAGQVSPITLEVAR | 2546 |
| 668      | MTLAGRIVDSIGASADAGAGAAADSAHEAVAALAAKHAIDGDARAVLDIRPAPVAGQVSPITLEVAR | 2546 |
| 1026b    | MTLAGRIVDSIGASADAGAGAAADSAHEAVAALAAKHAIDGDARAVLDIRPAPVAGQVSPITLEVAR | 2546 |
| BPC006   | MTLAGRIVDSIGASADAGAGAAADSAHEAVAALAAKHAIDGDARAVLDIRPAPVAGQVSPITLEVAR | 2546 |
|          | .....2490.....2500.....2510.....2520.....2530.....2540.....         |      |

---
